# Supplementary material for: Single Cell Analysis of Bistable Expression of Pathogenicity Island 1 and the Flagellar Regulon in Salmonella enterica
Source: MDPI journal article supplement (doi:10.3390/microorganisms9020210), 2021-01-20
Supplement: s1 [file s1]

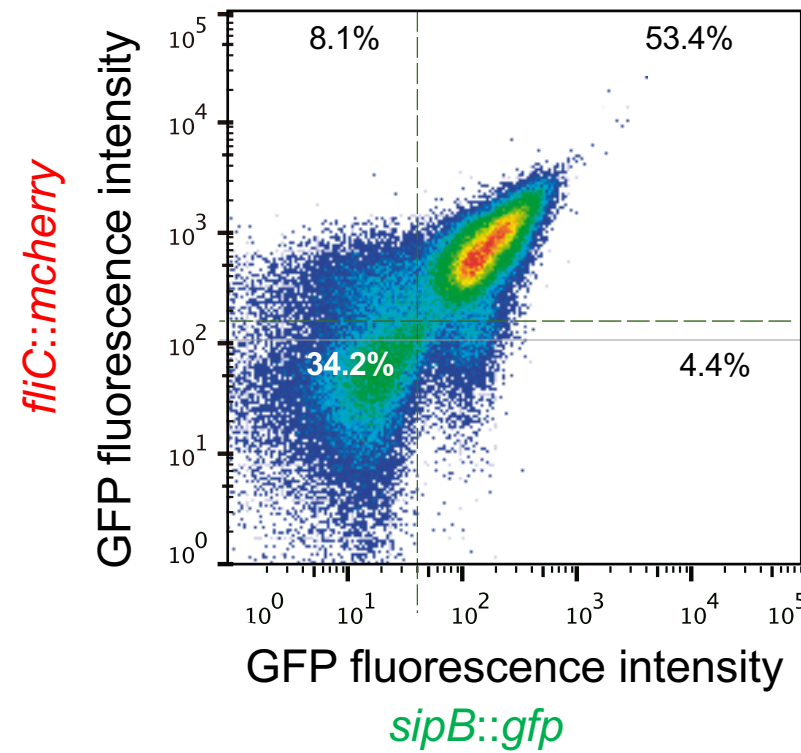

**Figure S2.** Single cell analysis of expression of SPI-1 (invasion, *sipB* gene) and flagellar (motility, *fliC* gene) genes at 37°C in LB under aerobiosis.
