# Supplementary material for: Single Cell Analysis of Bistable Expression of Pathogenicity Island 1 and the Flagellar Regulon in Salmonella enterica
Source: MDPI journal article supplement (doi:10.3390/microorganisms9020210), 2021-01-20
Supplement: s1 [file s1]

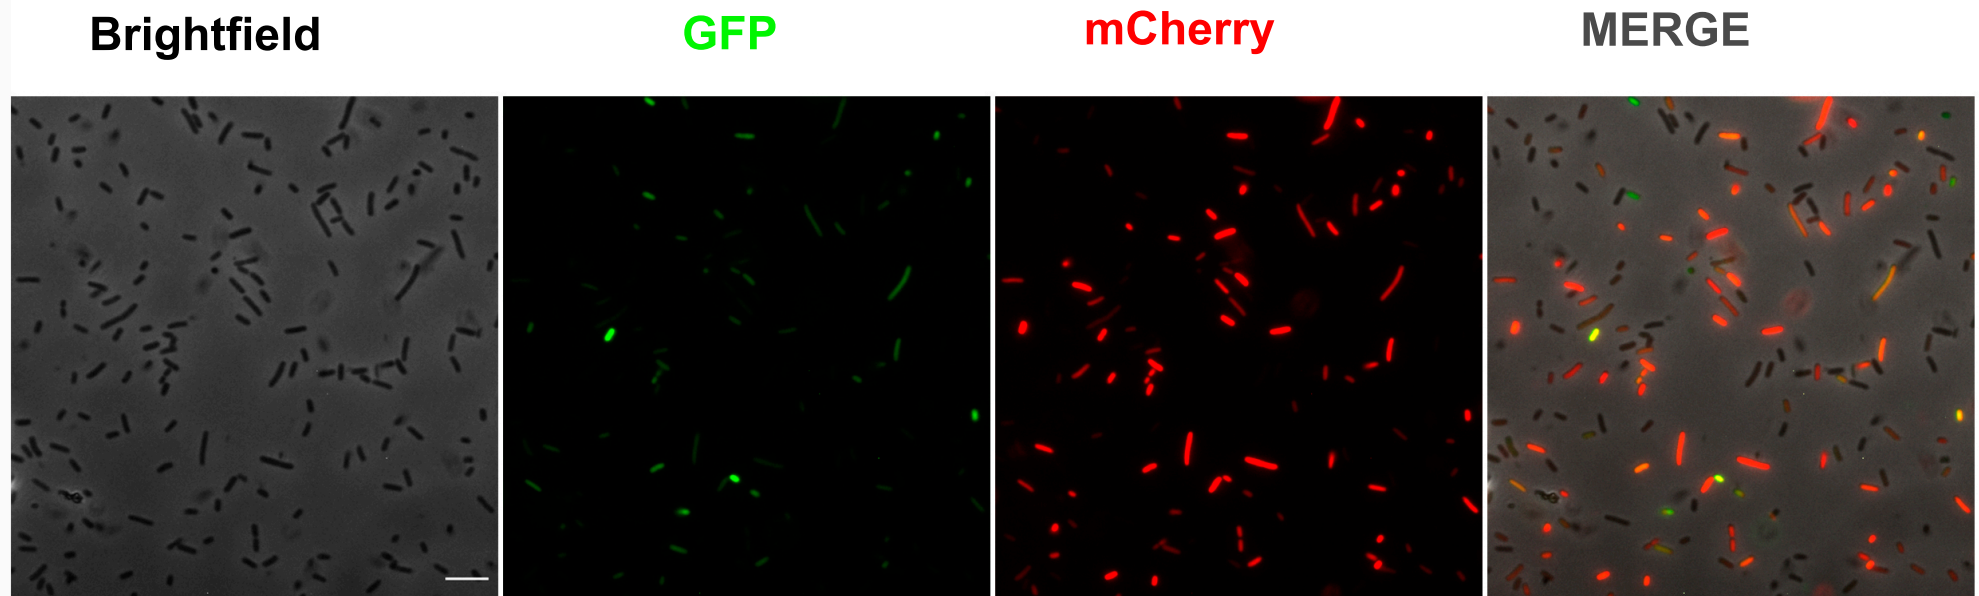

**Figure S1.** Fluorescence microscopy images of *S. Typhimurium* cells expressing SPI-1 (GFP) and/or flagellar (mCherry) regulon.
